1 **Salmonella enterica serovar Typhimurium SPI-1 and SPI-2 shape the**  
2 **transcriptional landscape of epithelial cells in a human intestinal organoid model**  
3 **system**

4 Anna-Lisa E. Lawrence<sup>a</sup> and Basel H. Abuaita<sup>a</sup>, Ryan P. Berger<sup>a</sup>, David R. Hill<sup>b</sup>, Sha  
5 Huang<sup>c</sup>, Veda K. Yadagiri<sup>b</sup>, Brooke Bons<sup>b</sup>, Courtney Fields<sup>b</sup>, Christiane E. Wobus<sup>a</sup>,  
6 Jason R. Spence<sup>bc</sup>, Vincent B. Young<sup>b</sup>, Mary X. O’Riordan<sup>a</sup>

7

8 <sup>a</sup>Department of Microbiology and Immunology, University of Michigan, Ann Arbor, MI,  
9 USA

10 <sup>b</sup>Department of Internal Medicine, University of Michigan, Ann Arbor, MI, USA

11 <sup>c</sup>Department of Cell and Developmental Biology, University of Michigan, Ann Arbor, MI,  
12 USA

13

14 Running title: Host responses to *Salmonella* in an organoid model

15

16 #Corresponding author: Mary X. O’Riordan, [oriordan@umich.edu](mailto:oriordan@umich.edu)

17

18

19

20 Anna-Lisa E. Lawrence and Basel H. Abuaita contributed equally to this work.

21

22

23

24 **Abstract**

25 The intestinal epithelium is a primary interface for engagement of the host response by  
26 foodborne pathogens, like *Salmonella enterica* serovar Typhimurium (STm). While  
27 interaction of STm with the mammalian host has been well studied *in vitro* in  
28 transformed epithelial cell lines or in the complex intestinal environment *in vivo*, few  
29 tractable models recapitulate key features of the intestinal epithelium. Human intestinal  
30 organoids (HIOs) contain a polarized epithelium with functionally differentiated cell  
31 subtypes, including enterocytes and goblet cells. HIOs contain luminal space that  
32 supports bacterial replication and are more amenable to experimental manipulation than  
33 animals while more reflective of physiological epithelial responses. Here we use the HIO  
34 model to define transcriptional responses of the host epithelium to STm infection, also  
35 determining host pathways dependent on *Salmonella* Pathogenicity Island-1 (SPI-1)  
36 and -2 (SPI-2) encoded Type 3 secretion systems (T3SS). Consistent with prior  
37 findings, we find that STm strongly stimulates pro-inflammatory gene expression.  
38 Infection-induced cytokine gene expression was rapid, transient and largely  
39 independent of SPI-1 T3SS-mediated invasion, likely due to continued luminal  
40 stimulation. Notably, STm infection led to significant down-regulation of host genes  
41 associated with cell cycle and DNA repair, an effect that required SPI-1 and SPI-2  
42 T3SS. The transcriptional profile of cell cycle-associated target genes implicates  
43 multiple miRNAs as likely mediators of STm-dependent cell cycle suppression. These  
44 findings from *Salmonella*-infected HIOs delineate common and distinct contributions of  
45 SPI-1 and SPI-2 T3SSs in inducing early host responses during enteric infection and  
46 reveal host cell cycle as a potential target during STm intracellular infection.

47 **Importance**

48 *Salmonella enterica* serovar Typhimurium (STm) causes a significant health burden  
49 worldwide, yet host responses to initial stages of intestinal infection remain poorly  
50 understood. Due to differences in infection outcome between mice and humans,  
51 evaluating physiological host responses driven by major virulence determinants of  
52 *Salmonella* have been difficult to date. Here we use the 3D human intestinal organoid  
53 model to define early responses to infection with wildtype STm and mutants defective in  
54 the SPI-1 or SPI-2 Type 3 secretion systems. Both secretion system mutants show  
55 defects in a mouse model of oral *Salmonella* infection but the specific contributions of  
56 each secretion system are less well understood. We show that STm upregulates pro-  
57 inflammatory pathways independently of either secretion system while downregulation  
58 of host cell cycle pathways is dependent on both SPI-1 and SPI-2. These findings lay  
59 the groundwork for future studies investigating how SPI-1- and SPI-2-driven host  
60 responses affect infection outcome and show the potential of this model to study host-  
61 pathogen interactions with other serovars to understand how initial interactions with the  
62 intestinal epithelium may affect pathogenesis.

## 63 **Introduction**

64 Enteric bacterial infections constitute a major human disease burden worldwide, with  
65 *Salmonella* species accounting for the most hospitalizations in outbreaks with a  
66 confirmed cause. In total, *Salmonella* causes an estimated 1.35 million infections in the  
67 US alone (1). Enteric infections occur in a complex and highly dynamic environment that  
68 traverses the distinct landscapes of the gastrointestinal tract. Relevant to understanding  
69 infection are the host processes that shape physicochemical properties of the intestine,  
70 including regulation of pH and nutrient absorption, the epithelial layer, which establishes  
71 a barrier using epithelial tight junctions, mucus and antimicrobial peptides, the  
72 microbiome and the pathogen itself. While animal models are valuable *in vivo*  
73 approaches to understand enteric infections, these models suffer from two major  
74 limitations. First, the complexity of the mammalian intestine makes finely controlled  
75 experimental manipulation and observation challenging. Second, the physiology of the  
76 intestine in different organisms can differ sharply, i.e., mice rarely exhibit diarrhea upon  
77 infection by pathogens that would cause diarrhea in humans.

78

79 *Salmonella enterica* serovar Typhimurium (STm) infection is a prime example of this  
80 disease difference between humans and mice. While STm infection is most commonly  
81 associated with self-limiting gastroenteritis in otherwise healthy humans, it causes  
82 systemic acute disease in C57Bl/6 mice (naturally Nramp-deficient) or chronic disease  
83 in Nramp-sufficient mouse strains (2, 3). To interrogate molecular mechanisms of  
84 host:pathogen interactions during intracellular STm infection, many previous studies  
85 have relied on transformed human cells, such as the HeLa cervical epithelial cell line or

86 Caco-2 intestinal epithelial cell line, or primary mouse cells like embryonic fibroblasts or  
87 macrophages. These cell culture systems have revealed much about STm infection, yet  
88 do not recapitulate several key features likely to be important during STm enteric  
89 infection. These include the continued presence of STm in the lumen, known to be an  
90 environment that supports robust replication, and interaction with non-transformed  
91 intestinal epithelial cells (IEC) which have specific properties, like mucus secretion or  
92 controlled cell cycle regulation. Thus, elucidating the cellular and molecular basis of  
93 STm:epithelial interactions in non-transformed human epithelial cells will improve our  
94 understanding of aspects of infection that may be relevant to human disease.

95

96 In the last decade, human intestinal organoid (HIO) systems have been developed to  
97 enable study of more complex IEC characteristics. These organoids are differentiated  
98 from non-transformed human pluripotent stem cell lines such as embryonic or induced  
99 pluripotent stem cells (ESC/iPSC), and form 3D cyst-like structures delineated by  
100 polarized epithelium with a mesenchymal layer surrounding a luminal space (4). HIOs  
101 contain multiple epithelial cell subsets, including enterocytes and goblet cells (4). A  
102 previous study characterized the global transcriptional profile of WT STm-infected HIOs  
103 using human induced pluripotent stem cells (hiPSC), and demonstrated that this IEC  
104 model could support STm infection (5). Their results established that the IEC  
105 transcriptional response to WT STm infection from the apical or basolateral route was  
106 dominated by pro-inflammatory innate immune signaling pathways. Further studies  
107 have demonstrated that HIOs can support survival and or replication of both pathogenic

108 and commensal bacteria, and that commensal organisms, like *Escherichia coli*  
109 (ECOR2), stimulate epithelial maturation and barrier function (6, 7).

110

111 Here we use HIOs derived from the H9 human embryonic stem cell line to define the  
112 host transcriptional response to infection by the commonly used laboratory strain STm  
113 SL1344 compared to isogenic mutants lacking functional SPI-1 or SPI-2 Type 3  
114 secretion systems (T3SS); major virulence determinants of STm, which secrete effector  
115 proteins into the host to mediate cellular invasion and remodeling of host processes (8,  
116 9). We find that STm-infected HIOs recapitulate some key aspects of intracellular  
117 infection as reported, but additionally that the continued presence of luminal bacteria  
118 drives a robust epithelial innate immune response even when STm invasion is minimal.  
119 Moreover, our results show that WT STm infection reduces transcript levels of genes  
120 involved in cell cycle regulation and DNA repair. These findings underscore the value of  
121 the HIO model for studying STm by validating characteristic host responses to infection  
122 by WT or mutant STm, as well as revealing new infection-induced host pathways.

123

## 124 **Results**

### 125 **Luminal *Salmonella* Typhimurium replicate within HIOs and invade HIO epithelial** 126 **cells**

127 To better recapitulate the *in vivo* human intestinal epithelial response to *Salmonella*  
128 infection, we used the 3-dimensional HIO model that allows longer-term bacterial-host  
129 interactions compared to traditional cell lines by maintaining the bacteria in the luminal  
130 space throughout the course of infection. STm was inoculated into the HIO lumen by

131 microinjecting each HIO with  $\sim 10^3$  colony forming units (CFU), or PBS as a control (**Fig.**  
132 **1A**). HIOs were allowed to recover for 2h prior to 15 min treatment with medium  
133 containing 100  $\mu\text{g}/\text{mL}$  gentamicin to kill bacteria that were introduced into the culture  
134 medium during microinjection. Subsequently, HIOs were cultured in medium containing  
135 10  $\mu\text{g}/\text{mL}$  gentamicin for the remainder of the infection to prevent replication of STm  
136 outside the HIOs. To confirm that STm replication could take place within HIOs, HIOs  
137 were injected with STm harboring the pGEN plasmid encoding the fluorescent protein  
138 DsRed (10), and bacterial burden was monitored by live fluorescence microscopy (**Fig**  
139 **1B,C**). Fluorescence intensity substantially increased by 24h post-infection (pi)  
140 indicating that STm replicated within the HIOs and replication appeared to occur  
141 predominantly in the lumen. Histological analysis of HIO sections revealed that luminal  
142 STm invaded intestinal epithelial cells and migrated to the basolateral side (**Fig. 1D**).  
143 Notably, invasion did not occur uniformly across the HIO as not all cells became  
144 infected. Additionally, infection did not appear to cause major structural damage to the  
145 HIO as viewed by H&E staining, but infection was accompanied by increased mucus  
146 production on the luminal surface of the epithelial barrier (**Fig. S1**). To further quantify  
147 bacterial burden, we enumerated total bacterial CFU per HIO and found a 3-log  
148 increase from the 2.5h to 24h time points (**Fig. 1E**). Consistent with previous reports,  
149 invasion was largely dependent on the STm type III secretion system (T3SS) encoded  
150 on pathogenicity island 1 (SPI-1) (11), as an inframe deletion in a structural gene of the  
151 T3SS apparatus ( $\Delta orgA$ ) drastically reduced intracellular CFU (**Fig. 1F**). Together  
152 these results demonstrate that the HIO model supports robust luminal and intracellular  
153 replication of STm, and that invasion of HIO epithelial cells is dependent on T3SS-1.

154

155 **Kinetic analysis of HIO transcriptional profiles define the acute response to**  
156 ***Salmonella* infection**

157 To gain insight into global HIO transcriptional responses stimulated by STm infection  
158 and to define the relative contributions of the major virulence determinants, T3SS-1 and  
159 -2, we performed RNA sequencing (RNA-seq) at 2.5h and 8h pi with HIOs microinjected  
160 with PBS, WT STm or isogenic mutants in  $\Delta orgA$  (T3SS-1<sup>mut</sup>) and  $\Delta ssaV$  (T3SS-2<sup>mut</sup>).  
161 Microinjection with each of these strains yielded similar levels of total bacteria at 2.5h  
162 while the T3SS-1<sup>mut</sup> strain showed significantly reduced levels of total and intracellular  
163 bacteria at 8h (**Fig. S2**), consistent with a role for the T3SS-1 in invasion. Principal  
164 component analysis (PCA) showed that all infected HIOs displayed markedly different  
165 transcriptional profiles than those injected with PBS (**Fig. 2A**). Notably, sample  
166 clustering occurred primarily by time post infection because 2.5h and 8h infected HIOs  
167 segregated from each other along the first principal component (x-axis). This difference  
168 accounted for 40% of the total variance and suggested that time post infection is a  
169 greater determinant of transcriptional variance than mutations in the pathogen. Similar  
170 patterns were observed by Pearson's correlation clustering, which showed clustering of  
171 2.5h and 8h samples (**Fig. 2B**). In addition, the Pearson's correlation heat map showed  
172 that HIOs infected with the invasion-defective T3SS-1<sup>mut</sup> segregated away from samples  
173 infected with WT STm and the T3SS-2<sup>mut</sup> at 2.5h pi while at 8h pi, HIOs infected with  
174 WT STm separated from both mutants. These data suggest that the T3SS-2<sup>mut</sup> is  
175 attenuated later in infection compared to wild type; a time point at which bacteria have  
176 invaded the epithelium, and the T3SS-2 is thought to be active to maintain intracellular



177 infection (8, 12, 13). Using differential expression analysis, we found that HIOs injected  
178 with any of the 3 strains of STm resulted in similar numbers of significant gene changes  
179 (p-value < 0.05) at 2.5h pi compared to PBS controls, suggesting that the early HIO  
180 response is driven primarily by luminal bacteria (**Fig. 2C, Table S1, S2**). In contrast, at  
181 8h both T3SS mutant strains induced fewer significant gene changes than WT  
182 suggesting that T3SS-1 and -2 effectors may be required for STm-induced responses  
183 later during infection (**Fig. 2D**).

184

### 185 **Immune pathways and cell cycle pathways are inversely regulated during** 186 ***Salmonella* infection**

187 To determine which pathways drive the epithelial response to STm infection, we  
188 performed pathway enrichment analysis from the Reactome database (**Table S3A,B**  
189 **and S4A,B**). Clustering of sub-pathways into major cellular processes in the Reactome  
190 database indicated that the majority of up-regulated pathways in all three infection  
191 conditions clustered into immune response and signal transduction processes (**Fig. 3A**).  
192 We examined individual pathway enrichment by gene ratio (fraction of genes in a  
193 pathway that were significantly changed) and the  $-\log_{10}(\text{p-value})$  to identify pathways  
194 modulated by STm infection and dependence on T3SS-1 or T3SS-2. To our surprise,  
195 we observed similar gene ratios between infection with WT STm and the two T3SS  
196 mutants in several cytokine signaling pathways, including genes encoding IL4, IL17 and  
197 IL10 (**Fig. 3B top**). These results are in contrast to previous reports that T3SS-1-  
198 dependent invasion strongly contributes to the inflammatory response including  
199 upregulation of cytokines such as *IL8* (14–16). However, distinct from most tissue

200 culture infection models, the HIO model system features sustained epithelial interaction  
201 with both luminal and intracellular *Salmonella*, pointing to a strong contribution of  
202 luminal bacteria in triggering early inflammation. Importantly, not all inflammatory  
203 pathways were equally enriched in all 3 infection conditions; innate immune signaling  
204 pathways, including Toll-like Receptor (TLR) signaling cascades were less enriched in  
205 T3SS-1<sup>mut</sup>-infected HIOs at 2.5h pi, and in both T3SS-1<sup>mut</sup>- and T3SS-2<sup>mut</sup>-infected  
206 HIOs compared to WT at 8h pi suggesting that modulation of these pathways is  
207 enhanced by intracellular infection (**Fig. 3B middle**).

208  
209 Few down-regulated pathways were observed at 2.5h pi, with more evident by 8h pi,  
210 largely related to cell cycle and DNA repair. Genes involved in cell cycle processes  
211 including checkpoints and mitotic (M) phase pathways were more highly suppressed in  
212 WT-infected HIOs, than in T3SS-1<sup>mut</sup> and T3SS-2<sup>mut</sup>-infected HIOs (**Fig. 3B bottom**).  
213 Taken together, our findings show that upregulated pathways primarily consisted of  
214 immune-related pathways that were only partially dependent on the two T3SS, while  
215 downregulated pathways dominated by cell cycle processes required both T3SS-1 and  
216 T3SS-2.

217

### 218 **Luminal STm contribute to rapid epithelial inflammatory gene expression**

219 We also analyzed expression at the individual gene level, selecting pro-inflammatory  
220 gene sets from the Reactome database (cytokines, chemokines and antimicrobial  
221 peptides (AMPs)), to examine fold change relative to PBS-injected control HIOs (**Fig.**  
222 **4A-C, Fig. S3**). Induction of genes in all three categories occurred rapidly, characterized

223 by markedly increased levels of cytokine, chemokine and AMP transcripts at 2.5h pi that  
224 were reduced by 8h pi. Global patterns revealed that infection with the T3SS-1<sup>mut</sup>  
225 induced weaker stimulation of these proinflammatory mediators compared to the other  
226 infection conditions, although many transcripts were still up-regulated compared to  
227 PBS-injected HIOs. The strongest responders to infection were cytokines *CSF3*, also  
228 called granulocyte colony stimulating factor (G-CSF), and *IL17C*, and the antimicrobial  
229 peptide beta defensin-2 (*DEFB4*). Strong upregulation of *IL17C* and *DEFB4*, genes  
230 involved in epithelial intrinsic defenses (17–19), suggests that upon sensing infection,  
231 epithelial cells mount a direct antimicrobial response in addition to producing  
232 chemokines to recruit other immune cells. Notably, chemokine genes were not induced  
233 as strongly at these time points compared to cytokine and AMP genes (**Fig. 4B**). Some  
234 other responses occurred independently of either T3SS-1 and T3SS-2 including Tumor  
235 Necrosis Factor (*TNF*), *IL8* and *CXCL5* as fold change was comparable between the  
236 three conditions while *IL6* expression was dependent on T3SS-1.

237

238 To test whether gene level expression differences were reflected at the protein level, we  
239 collected supernatants from infected HIOs at 2.5h and 8h pi and measured cytokines by  
240 ELISA. In concordance with the transcript data, release of TNF, IL8, and CXCL5 were  
241 consistent across all three infection conditions (**Fig. 4D, Fig. S4**). While the degree of  
242 transcript upregulation for AMPs varied between time points across the three infections,  
243 release of these mediators (Beta Defensin-2 and ELAFIN) into the medium did not  
244 significantly differ between WT and mutant infections. In contrast, IL6, which was  
245 increased in just STm and T3SS-2<sup>mut</sup>-infected HIOs by 8h pi at the transcriptional level,

246 was present at significantly lower levels in supernatants from HIOs infected with either  
247 mutant. While there was less upregulation of *IL6* transcript in T3SS-1<sup>mut</sup> infected HIOs  
248 compared to WT-infected HIOs, reduced levels of IL6 in the supernatant in T3SS-2<sup>mut</sup>  
249 infected HIOs suggests there may be additional post-transcriptional regulation affecting  
250 IL6 production in the HIOs during T3SS-2<sup>mut</sup> infection. Collectively, these results show  
251 that the HIOs mount a rapid pro-inflammatory, antimicrobial transcriptional response to  
252 STm infection and that invasion-defective T3SS-1<sup>mut</sup> bacteria, previously reported to  
253 have a large defect in inducing an inflammatory response, can signal through the  
254 luminal compartment to induce robust inflammation following prolonged interactions with  
255 the epithelium.

256

### 257 **Downregulation of cell cycle pathways during STm infection is dependent on** 258 **T3SS-1 and T3SS-2**

259 Next, we turned our attention to genes that were downregulated during STm infection.  
260 Our pathway enrichment analysis identified cell cycle as the category containing the  
261 most significantly downregulated pathways. To further assess whether downregulation  
262 of cell cycle-related pathways was dependent on T3SS-1 and -2, we directly compared  
263 genes in the cell cycle pathway that were significantly changed in the three infection  
264 conditions. In agreement with our findings looking at major cellular processes  
265 responding to infection (**Fig. 3A**), we found relatively few genes in the cell cycle  
266 pathway significantly downregulated compared to PBS-injected HIOs at 2.5h pi (**Fig.**  
267 **5A**). However, by 8h pi the number of significantly downregulated genes substantially  
268 increased from 76 genes to 161 genes in the WT-infected HIOs (**Fig. 5B**). Gene

269 downregulation was partially dependent on both T3SS-1 and -2, as only 68 genes and  
270 58 genes, respectively, were significantly downregulated at 8h pi. These observations  
271 are consistent with a role for the T3SS in establishing an intracellular niche for STm  
272 replication.

273

274 Decreases in transcript levels can occur through several mechanisms, including halting  
275 synthesis of new transcripts or through degradation of existing transcripts by miRNA.  
276 Evidence for miRNA expression manipulation by pathogens, including *Salmonella*,  
277 continues to emerge (20–23), so we used gprofiler2 (24) as the basis for an informatics  
278 approach to identify potential regulatory miRNAs associated with our downregulated  
279 gene sets. Infection with WT STm resulted in the most significant predicted association  
280 of miRNAs, with elevated coverage of miRNA-regulated gene sets at 8h compared to  
281 2.5h pi (**Fig. 5C-D**). Notably, these miRNA species were not predicted to be strongly  
282 associated with the downregulated gene sets from T3SS-1<sup>mut</sup> or T3SS-2<sup>mut</sup>-infected  
283 HIOs (**Fig. 5C-D**). Several of these miRNA species including miR-192-5p and miR-155-  
284 5p that were more significantly associated with the WT-infected HIO gene set, are  
285 known to regulate cell proliferation (25, 26). These data suggest that miRNA-mediated  
286 downregulation of cell cycle genes may contribute to modulation of cell cycle-related  
287 pathways during *Salmonella* infection, in a T3SS-dependent manner.

288

## 289 **Discussion**

290 Human intestinal epithelial responses to *Salmonella enterica* serovar Typhimurium are  
291 still incompletely understood, despite the prominent contribution of this species to

292 human disease burden. Here we used the human intestinal organoid model to analyze  
293 transcriptional profiles defining early epithelial responses to STm infection, including the  
294 contribution of two major virulence determinants, T3SS-1 and -2. We found that HIOs  
295 responded rapidly and robustly to all 3 infections by upregulating pro-inflammatory  
296 pathways early and transiently, whereas downregulation of host pathways including cell  
297 cycle and DNA repair occurred later and only in WT STm-infected HIOs.

298

299 *Salmonella* infection strongly induces inflammatory responses, and exploits the  
300 inflammatory environment created during infection to outcompete the resident  
301 microbiota and replicate within the lumen of the intestine (27). Accordingly, our  
302 transcriptomics analysis found that the dominant response occurring in the HIOs was  
303 inflammatory. While this was largely expected for WT STm infection, based on studies  
304 in other model systems, we had predicted that infection with T3SS-1<sup>mut</sup> would result in  
305 reduced activation of these pathways. Prior studies showed that T3SS-1 strongly  
306 contributes to the inflammatory response with significantly reduced levels of  
307 inflammation and colitis in mouse models, and little to no upregulation of pro-  
308 inflammatory cytokines in tissue culture models of STm infection (14–16). However, we  
309 observed largely similar patterns of induction of several pro-inflammatory mediators in  
310 HIOs infected with T3SS-1<sup>mut</sup>. This included IL8, which in HeLa cells was dependent on  
311 T3SS-1 effectors for upregulation (28). This finding highlights the advantage of using  
312 model systems that more closely reflect physiologic infection conditions. Although  
313 immortalized cell lines can more easily be manipulated than mouse models, the  
314 inoculum is removed after the initial infection, and therefore longer-term interactions

315 between the luminal surface of the epithelium and the bacteria cannot be easily studied.  
316 The enclosed lumen of the HIOs naturally limits the extent of extracellular bacterial  
317 replication and allows study of these longer-term interactions, revealing a strong  
318 contribution of luminal bacteria in inducing upregulation of pro-inflammatory mediators  
319 since there was a >2-log defect in invasion with the T3SS-1<sup>mut</sup>.

320

321 Among our upregulated gene sets, key targets reflected known modulators of STm  
322 infection. The strongest responder in all 3 infection conditions, *CSF3* (encoding G-CSF),  
323 was previously implicated in regulating a super-shedder phenotype of *Salmonella* to  
324 enhance spread of the bacteria to other hosts, and injection of G-CSF in moderate-  
325 shedder animals recapitulated the super-shedder phenotype (29). Additionally, *IL17C*  
326 and *DEFB4* contribute to epithelial intrinsic defenses against bacterial pathogens  
327 through regulating intestinal barrier integrity and bacterial killing, respectively (17–19).  
328 Overall, the transcriptional responses across the 3 infection conditions were similar with  
329 only a slight decrease in upregulation in the T3SS-1<sup>mut</sup>-infected HIOs. Notably,  
330 upregulation of *IL6* expression appeared to be dependent on T3SS-1. Interestingly,  
331 while *IL6* transcript upregulation was dependent on T3SS-1, neither T3SS-1<sup>mut</sup> or T3SS-  
332 2<sup>mut</sup> infections stimulated significant IL6 protein production compared to PBS-injected  
333 HIOs. These observations suggest a novel function for T3SS-2 in post-transcriptional  
334 regulation of IL6 production. Together, these findings highlight several avenues for  
335 future study including IL6 post-transcription regulation by T3SS-2, and how *CSF3*  
336 regulation and function in the early stages of STm epithelial infection may contribute to

337 a supershedder phenotype, using a HIO system reconstituted with immune cells, like  
338 neutrophils.

339

340 Down-regulation of host gene expression was dependent on T3SS-1 and -2, notably  
341 host cell cycle-related genes. Cell cycle regulation in the intestine affects the rate of cell  
342 turnover in order to shed infected or damaged cells and is therefore commonly targeted  
343 by bacteria (30, 31). A previous study from our consortium group showed that HIO  
344 colonization with a commensal strain of *E. coli* enhanced cell proliferation and could  
345 therefore be protective against invasive infections (6). In contrast, Holden and  
346 colleagues recently reported that STm can block cell cycle progression in mouse  
347 intestinal cells and proposed that this enhances intestinal colonization of STm (32). This  
348 study showed that T3SS-2 effectors regulated this phenotype through targeting proteins  
349 important for cleavage furrow formation, rather than exerting regulation at the  
350 transcriptional level. Here we found that both T3SS-1 and T3SS-2 contribute to  
351 downregulating cell cycle-related transcripts, and this is the first study to our knowledge  
352 that implicates regulation of the cell cycle by STm at the transcript level. Moreover,  
353 miRNA expression is increasingly appreciated as a mechanism to regulate gene  
354 expression during bacterial infections and our results strongly predict regulation by  
355 specific miRNAs, opening an avenue for further exploration of cell cycle regulation by  
356 STm.

357

358 Collectively, the complex and dynamic transcriptional response in the STm-infected  
359 HIOs demonstrate the utility of using this non-transformed epithelial cell model to



360 examine what aspects may be specific and physiologically relevant to human disease.  
361 HIOs supported both luminal and intracellular bacterial replication, while still maintaining  
362 overall structural integrity, better mimicking the interaction of both these bacterial  
363 populations with the epithelium *in vivo*. This model system allows for observation of  
364 infected cells, as well as bystander cells which can be studied using single cell RNA-  
365 seq, and because of the enclosed environment, the entire HIO can be visualized in  
366 sections or by live cell imaging. Additionally, with this enclosed lumen, it is possible to  
367 study sustained responses induced by the bacteria from the extracellular environment,  
368 an important aspect of STm infection biology that has been difficult to study in traditional  
369 tissue culture models. As further evidence to strengthen this model for future studies,  
370 our upregulated gene set for the WT infection was consistent with data from an earlier  
371 study, which looked at the HIO transcriptional response to WT STm infection (5),  
372 highlighting the reproducibility of this model system. Thus, this concordance opens  
373 areas for future work, including studying post-transcriptional regulation of cytokine  
374 production by T3SS-2 and transcriptional regulation of cell cycle processes by STm.  
375 Additionally, the HIO model is well suited to characterize host epithelial responses to  
376 other *Salmonella enterica* serovars in order to better understand how individual  
377 serovars interact uniquely with the host, as well as adding additional components such  
378 as a simplified microbiome or immune cells, to study more complex interactions  
379 between *Salmonella* and the human intestine.

380

## 381 **Materials and Methods**

### 382 **HIO Differentiation and Culture**

383 HIOs were generated by the In Vivo Animal and Human Studies Core at the University  
384 of Michigan Center for Gastrointestinal Research, as previously described (7,33).  
385 Human ES cell line WA09 (H9) was obtained from Wicell International Stem Cell Bank  
386 and cultured on Matrigel (BD Biosciences) coated 6-well plates in mTeSR1 media  
387 (Stem Cell Technologies) at 37°C in 5% CO<sub>2</sub>. Cells were seeded onto Matrigel-coated  
388 24-well plates in fresh mTeSR1 media and grown until 85-90% confluence. Definitive  
389 endoderm differentiation was induced by washing the cells with PBS and culturing in  
390 endoderm differentiation media (RPMI 1640, 2%FBS, 2 mM L-glutamine, 100 ng/ml  
391 Activin A and 100 Units/ml Pen/Strep) for three days where media were exchanged  
392 each day. Cells were then washed with endoderm differentiation media without Activin A  
393 and cultured in mid/hindgut differentiation media (RPMI 1640, 2%FBS, 2 mM L-  
394 glutamine, 500 ng/ml FGF4, 500 ng/ml WNT3A and 100 Units/ml Pen/Strep) for 4 days  
395 until spheroids were present. Spheroids were collected, mixed with ice cold Matrigel  
396 (50µl of Matrigel + 25µl of media + 50 spheroids), placed in the center of each well of a  
397 24-well plate, and incubated at 37°C for 10 minutes to allow Matrigel to solidify. Matrigel  
398 embedded spheroids were grown in ENR media (DMEM:F12, 1X B27 supplement, 2  
399 mM L-glutamine, 100 ng/ml EGF, 100 ng/ml Noggin, 500 ng/mL Rspondin1, and 15  
400 mM HEPES) for 14 days where medium was replaced every 4 days. Spheroids growing  
401 into organoids (HIOs) were dissociated from Matrigel by pipetting using a cut wide-tip  
402 (2-3 mm). HIOs were mixed with Matrigel (6 HIOs + 25µL of media + 50µL of Matrigel)  
403 and placed in the center of each well of 24-well plates and incubated at 37°C for 10  
404 minutes. HIOs were further grown for 14 days in ENR media with medium exchanged  
405 every 4 days. Before use in experiments, HIOs were carved out of Matrigel, washed

406 with DMEM:F12 media, and re-plated with 5 HIO/well in 50 $\mu$ L of Matrigel in ENR media  
407 with medium exchanged every 2-3 days for 7 days prior to microinjection.

408

#### 409 **Bacterial Growth Condition and HIO Microinjection**

410 STm strains used in this study are listed in Table S5. Strains were stored at  $-80^{\circ}\text{C}$  in LB  
411 medium containing 20% glycerol and cultured on Luria-Bertani (LB, Fisher) agar plates.  
412 Selected colonies were grown overnight at  $37^{\circ}\text{C}$  under static conditions in LB liquid  
413 broth. Bacteria were pelleted, washed and re-suspended in PBS. Bacterial inoculum  
414 was estimated based on OD600 and verified by plating serial dilutions on agar plates to  
415 CFU. HIOs were cultured in groups of 5/well using 4-well plates (ThermoFisher).  
416 Individual HIO lumens were microinjected using a glass caliber needle with 1 $\mu$ L of PBS  
417 control or different STm mutants ( $10^5\text{CFU/HIO}$  or  $10^3\text{CFU/HIO}$  for 24h infections). HIOs  
418 were washed with PBS and incubated for 2h at  $37^{\circ}\text{C}$  in ENR media to allow for re-  
419 sealing of the epithelial layer. HIOs were then treated with gentamicin (100  $\mu\text{g/ml}$ ) for 15  
420 min to kill bacteria outside the HIOs, then incubated in fresh medium with gentamicin  
421 (10  $\mu\text{g/ml}$ ).

422

#### 423 **Quantitative measurement of HIO-associated bacteria and cytokine secretion**

424 Quantitation of viable bacteria was assessed per HIO. Individual HIOs were removed  
425 from Matrigel, washed with PBS and homogenized in PBS. Total CFU/HIO were  
426 enumerated by serial dilution and plating on LB agar. To assess intracellular bacterial  
427 burden, HIOs were sliced in half, treated with gentamicin (100  $\mu\text{g/ml}$ ) for 10 min to kill  
428 luminal bacteria, washed with PBS, homogenized and bacterial CFU were enumerated

429 on LB-agar. Medium from each well (5 HIOs/well) was collected at indicated time points  
430 after microinjection and cytokines, chemokines and defensins were quantified by ELISA  
431 assay at the UM ELISA core.

432

### 433 **Immunohistochemistry and Immunofluorescence Staining**

434 HIOs were fixed with 10% neutral buffered formalin or Carnoy's solution for 2 days and  
435 embedded in paraffin. HIOs were sectioned (5  $\mu$ m thickness) by the UM Histology Core  
436 and stained with hematoxylin and eosin (H&E). Carnoy's-fixed HIO sections were  
437 stained with periodic acid-Schiff (PAS) staining reagents according to manufacturer's  
438 instructions (Newcomersupply). H&E- and PAS-stained slides were imaged on an  
439 Olympus BX60 upright microscope. For immunofluorescence staining, formalin-fixed  
440 HIO sections were deparaffinized and subjected to antigen retrieval in sodium citrate  
441 buffer (10 mM Sodium citrate, 0.05% Tween 20, pH 6.0). Sections were permeabilized  
442 with PBS+ 0.2% Triton X-100 for 30 min, then incubated in blocking buffer (PBS, 5%  
443 BSA, and 10% normal goat serum) for 1h. Human Occludin was stained using rabbit  
444 anti-Occludin polyclonal antibody (ThermoFisher) in blocking buffer overnight at 4°C.  
445 Goat anti-mouse secondary antibody conjugated to Alexa-594 was used according to  
446 manufacturer's instructions (ThermoFisher) for 1h RT in blocking buffer. *Salmonella*  
447 were stained using FITC-conjugated Anti-*Salmonella* Typhimurium antibody (Santa  
448 Cruz, 1E6) in blocking buffer for 1h RT. DAPI was used to stain DNA. Sections were  
449 mounted using coverslips (#1.5) and Prolong Diamond Antifade Mountant  
450 (ThermoFisher). Images were taken on the Nikon A1 confocal microscope and  
451 processed using ImageJ.

452

### 453 **RNA Sequencing and Analysis**

454 Total RNA was isolated from groups of 5 HIOs per replicate with a total of 4 replicates  
455 per condition using the mirVana miRNA Isolation Kit (ThermoFisher). Cytosolic and  
456 mitochondrial ribosomal RNA was removed from samples using the Ribo-Zero Gold Kit  
457 according to manufacturer's instructions (Illumina). The quality of RNA was confirmed  
458 (RIN >8.5) using a Bioanalyzer and used to prepare cDNA libraries by the UM DNA  
459 Sequencing Core. Libraries were sequenced on Illumina HiSeq 2500 platforms (single-  
460 end, 50 bp read length).

461

### 462 **Statistical Methods**

463 Data were analyzed using Graphpad Prism 7 and R software. Differences between 2  
464 groups were tested using the unpaired-t test or Mann-Whitney test. Differences between  
465 3 or more groups were tested using Two-way ANOVA, followed by Tukey's multiple  
466 comparisons test. The mean of at least 3 independent experiments was presented with  
467 error bars showing standard deviation (SD). P values of less than 0.05 were considered  
468 significant and designated by: \*P < 0.05, \*\*P < 0.01, \*\*\*P < 0.001 and \*\*\*\*P < 0.0001.  
469 All statistically significant comparisons within experimental groups are marked.

470

### 471 **Data and Software Availability**

472 Data availability: deposition into ArrayExpress in progress. Source code for analyses  
473 can be found at: [https://github.com/rberger997/HIO\\_dualseq2](https://github.com/rberger997/HIO_dualseq2) and  
474 [https://github.com/aelawren/HIO\\_RNAseq](https://github.com/aelawren/HIO_RNAseq).

475

## 476 **RNAseq analysis protocol**

### 477 **Sequence alignment**

478 Sequencing generated FASTQ files of transcript reads were pseudoaligned to the  
479 human genome (GRCh38.p12) using kallisto software(34). Transcripts were converted  
480 to estimated gene counts using the tximport(35) package with gene annotation from  
481 Ensembl (36).

482

### 483 **Differential gene expression**

484 Differential expression analysis was performed using the DESeq2 package (37) with p-  
485 values calculated by the Wald test and adjusted p-values calculated using the  
486 Benjamani & Hochberg method (38).

487

### 488 **Pathway enrichment analysis**

489 Pathway analysis was performed using the Reactome pathway database and pathway  
490 enrichment analysis in R using ReactomePA software package (39). miRNA analysis  
491 was performed using Gprofiler2 package (24).

492

### 493 **Statistical analysis**

494 Analysis was done using RStudio version 1.1.453. Plots were generated using ggplot2  
495 (40) with data manipulation done using dplyr (41). Euler diagrams of gene changes  
496 were generated using the Eulerr package (42). Cluster heatmaps were generated using  
497 the pheatmap package (43).

498

499 **Acknowledgments**

500 This work was supported by the NIAID U19AI116482-01 grant. A-LL. was supported by the  
501 Molecular Mechanisms of Microbial Pathogenesis training grant (NIH T32 AI007528). We thank  
502 the Host-Microbiome Initiative, the Center for Live Cell Imaging (CLCI), Microscopy and Image  
503 Analysis Laboratory (MIL), the Comprehensive Cancer Center Immunology and Histology Cores  
504 supported by the University of Michigan Cancer Center Support Grant (P30CA46592), and the  
505 DNA Sequencing Core at University of Michigan Medical School. We gratefully acknowledge  
506 members of the O’Riordan laboratory as well as members of the Wobus, Young, Takayama and  
507 Spence laboratories for many helpful discussions.

508 **Figures**

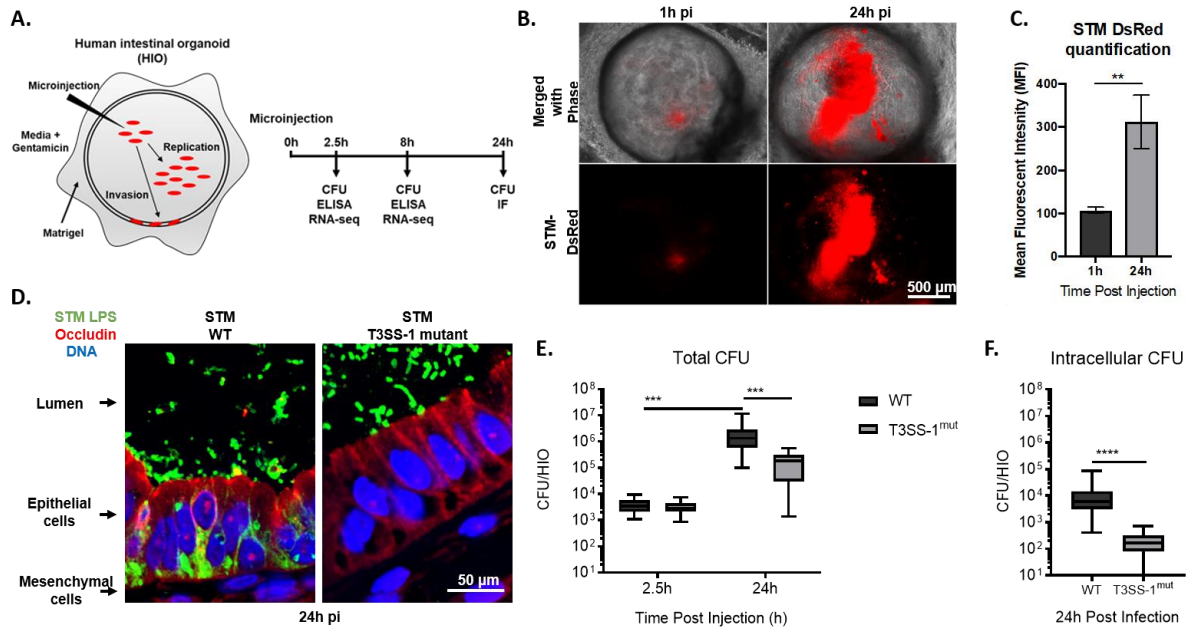

509

510 **Figure 1: WT STm replicates within the lumen of HIOs and invades IECs**  
 511 **dependent on T3SS-1**

512 (A) Diagram of experimental protocol. (B) Fluorescence microscopy of HIOs injected  
 513 with STm-DsRed, a strain that harbors the pGEN plasmid encoding Red fluorescence  
 514 protein (DsRed) (10). (C) Quantification of Fig.1B. n = 3 biological replicates. Error bars  
 515 represent SD. p = 0.0047 by unpaired t test. (D) Immunofluorescence of HIO sections  
 516 infected with STm WT (left) and STm T3SS-1<sup>mut</sup> (right). (E) Total bacteria in HIOs at 2.5  
 517 and 24h post injection. n=16 biological replicates. Whiskers represent min and max  
 518 values. Significance calculated by two-way ANOVA. (F) Intracellular bacteria in HIOs at  
 519 24h post injection. n > 31 biological replicates. Whiskers represent min and max values.  
 520 Significance calculated by Mann-Whitney test.



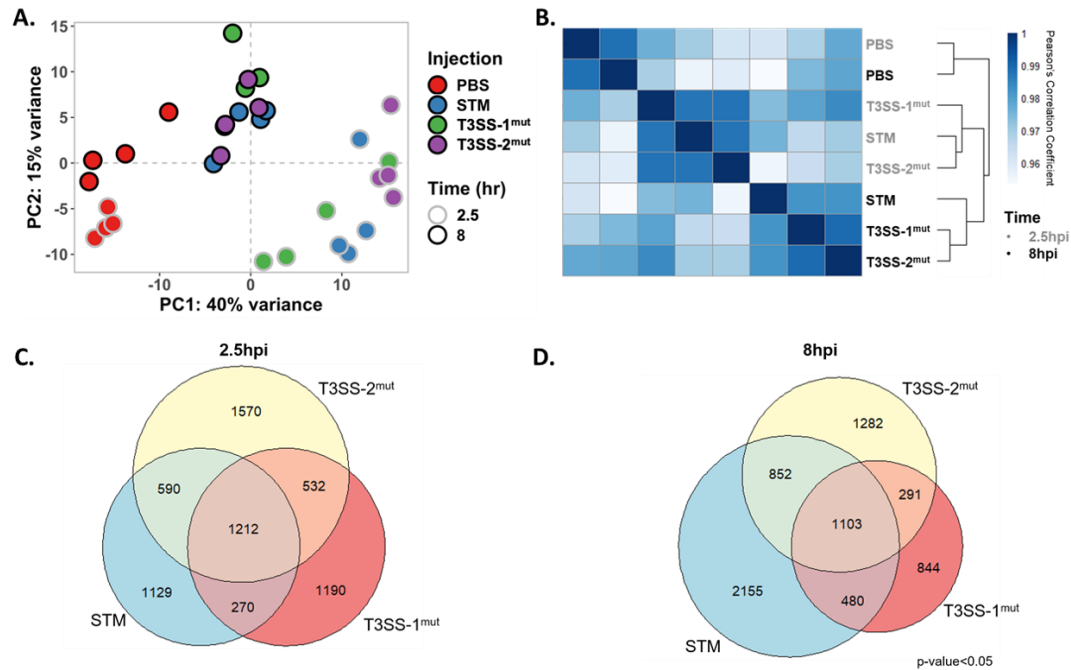

521

522 **Figure 2: HIOs mount an acute transcriptional response to *Salmonella* infection**

523 (A) Principal component analysis of HIOs injected with STM T3SS mutants. Each circle  
524 represents a biological replicate. (B) Sample distance plot of each HIO condition at 2.5h  
525 (gray) and 8h (black) post injection. Sample distance calculated from normalized gene  
526 counts across 4 biological replicates. (C-D) Euler diagram comparison of gene changes  
527 in each HIO condition relative to PBS injected HIOs at (C) 2.5h and (D) 8h post  
528 injection. Genes were filtered by p-value < 0.05.

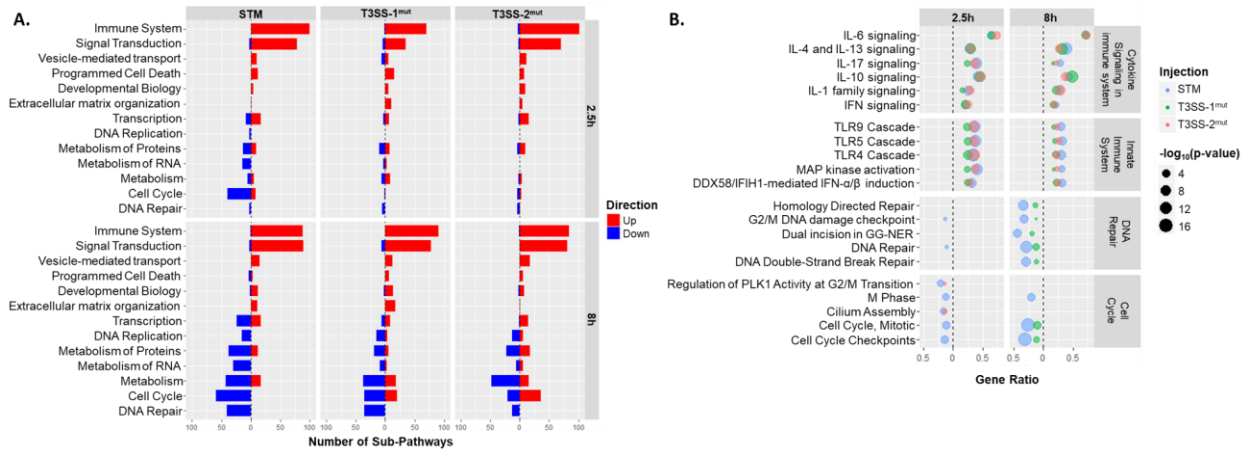

529

530 **Figure 3: Reactome pathway enrichment reveals upregulation of immune system**  
 531 **pathways and downregulation of cell cycle and DNA repair pathways**

532 (A) Number of sub-pathways clustering into major Reactome pathways. Significantly up-  
 533 regulated (red) or down-regulated (blue) genes were analyzed using ReactomePA (39)  
 534 and pathways were clustered into the major pathways from the Reactome database.  
 535 Major pathways were filtered so that at least 12 sub-pathways were significantly  
 536 enriched in at least one condition. (B) Dot plot showing top pathways enriched from  
 537 Reactome database. Pathway coverage shown as gene ratio.  $-\log_{10}(\text{p-value})$  presented  
 538 as the dot size with WT STm in blue, T3SS-1<sup>mut</sup> in green and T3SS-2<sup>mut</sup> in red.  
 539 Upregulated pathways shown on the right of the dotted line and down-regulated  
 540 pathways on the left.

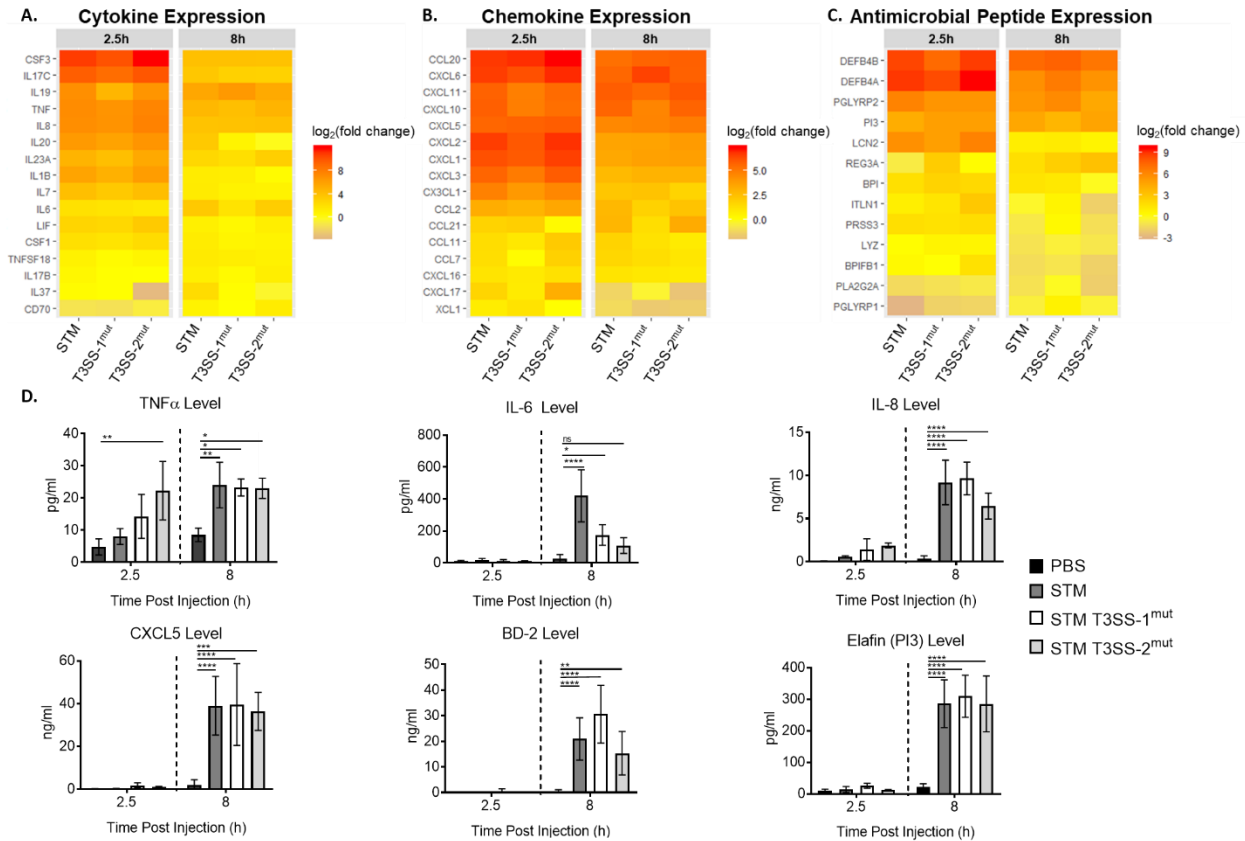

541  
542 **Figure 4: Cytokine, chemokine and antimicrobial peptide induction is not**  
543 **dependent on T3SS-1 or T3SS-2**  
544 (A-C) Gene expression presented as  $\log_2(\text{fold change})$  relative to PBS injected HIOs at  
545 2.5h and 8h post injection. (A) Cytokine expression, (B) Chemokine expression, (C)  
546 Antimicrobial peptide expression. (D) Cytokine, chemokine and antimicrobial peptide  
547 levels measured from HIO supernatant at 2.5 and 8h post injection via ELISA. n=4  
548 biological replicates. Error bars represent SD. Significance calculated by two-way  
549 ANOVA.

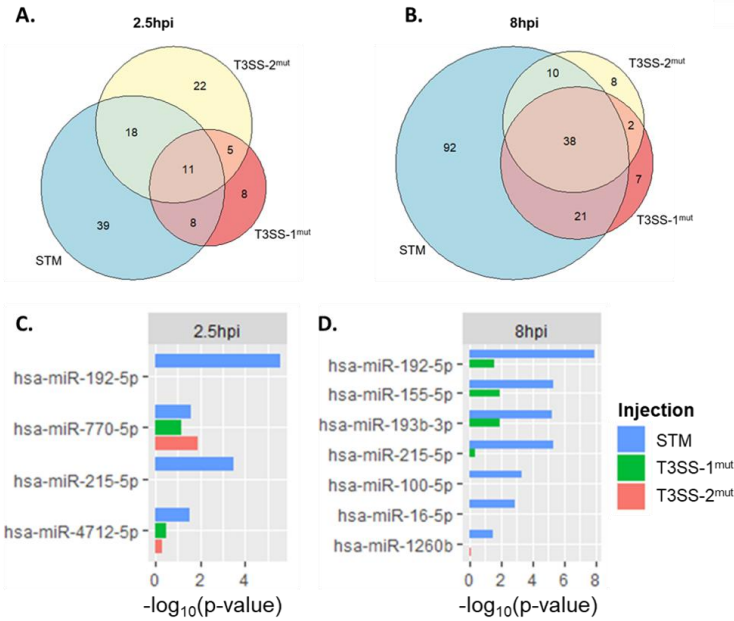

550

551 **Figure 5: Cell cycle pathways are downregulated during STm infection dependent**  
552 **on T3SS-1 and T3SS-2**

553 (A-B) Euler diagram comparison of cell cycle genes downregulated compared to PBS  
554 injected HIOs at 2.5h (A) and 8h (B) post injection. Genes were filtered by p-value <  
555 0.05. (C-D) miRNA enrichment profiles were calculated using Gprofiler package in R  
556 (24) based on significantly downregulated genes compared to PBS injected HIOs. –  
557  $\log_{10}(\text{p-value})$  plotted for each miRNA that is significantly enriched in at least one  
558 infection condition.

559 **References**

- 560 1. 2020. Salmonella Homepage | CDC.
- 561 2. Valdez Y, Grassl GA, Guttman JA, Coburn B, Gros P, Vallance BA, Finlay BB.  
562 2009. Nramp1 drives an accelerated inflammatory response during Salmonella-  
563 induced colitis in mice. *Cell Microbiol* 11:351–362.
- 564 3. Monack DM, Bouley DM, Falkow S. 2004. Salmonella typhimurium persists within  
565 macrophages in the mesenteric lymph nodes of chronically infected Nramp1<sup>+/+</sup>  
566 mice and can be reactivated by IFN $\gamma$  neutralization. *J Exp Med* 199:231–241.
- 567 4. Spence JR, Mayhew CN, Rankin SA, Kuhar MF, Vallance JE, Tolle K, Hoskins EE,  
568 Kalinichenko VV, Wells SI, Zorn AM, Shroyer NF, Wells JM. 2011. Directed  
569 differentiation of human pluripotent stem cells into intestinal tissue in vitro. *Nature*  
570 470:105–109.
- 571 5. Forbester JL, Goulding D, Vallier L, Hannan N, Hale C, Pickard D, Mukhopadhyay  
572 S, Dougan G. 2015. Interaction of Salmonella enterica serovar Typhimurium with  
573 intestinal organoids derived from human induced pluripotent stem cells. *Infect*  
574 *Immun* 83:2926–2934.
- 575 6. Hill DR, Huang S, Nagy MS, Yadagiri VK, Fields C, Mukherjee D, Bons B, Dedhia  
576 PH, Chin AM, Tsai Y-H, Thodla S, Schmidt TM, Walk S, Young VB, Spence JR.  
577 2017. Bacterial colonization stimulates a complex physiological response in the  
578 immature human intestinal epithelium. *Elife* 6.

- 579 7. Leslie JL, Huang S, Opp JS, Nagy MS, Kobayashi M, Young VB, Spence JR. 2015.  
580 Persistence and toxin production by *Clostridium difficile* within human intestinal  
581 organoids result in disruption of epithelial paracellular barrier function. *Infect Immun*  
582 83:138–145.
- 583 8. Jennings E, Thurston TLM, Holden DW. 2017. *Salmonella* SPI-2 Type III Secretion  
584 System Effectors: Molecular Mechanisms And Physiological Consequences. *Cell*  
585 *Host Microbe* 22:217–231.
- 586 9. Lou L, Zhang P, Piao R, Wang Y. 2019. *Salmonella* Pathogenicity Island 1 (SPI-1)  
587 and Its Complex Regulatory Network. *Front Cell Infect Microbiol* 9:270.
- 588 10. Alteri CJ, Himpel SD, Pickens SR, Lindner JR, Zora JS, Miller JE, Arno PD, Straight  
589 SW, Mobley HLT. 2013. Multicellular Bacteria Deploy the Type VI Secretion  
590 System to Preemptively Strike Neighboring Cells. *PLoS Pathogens*.
- 591 11. Galan JE, Curtiss RY III. allow *Salmonella typhimurium* to penetrate tissue culture  
592 cells.
- 593 12. Pfeifer CG, Marcus SL, Steele-Mortimer O, Knodler LA, Finlay BB. 1999.  
594 *Salmonella typhimurium* virulence genes are induced upon bacterial invasion into  
595 phagocytic and nonphagocytic cells. *Infect Immun* 67:5690–5698.
- 596 13. Laughlin RC, Knodler LA, Barhoumi R, Payne HR, Wu J, Gomez G, Pugh R,  
597 Lawhon SD, Bäumlér AJ, Steele-Mortimer O, Adams LG. 2014. Spatial segregation  
598 of virulence gene expression during acute enteric infection with *Salmonella enterica*  
599 serovar Typhimurium. *MBio* 5:e00946–13.

- 600 14. Bruno VM, Hannemann S, Lara-Tejero M, Flavell RA, Kleinstein SH, Galán JE.  
601 2009. Salmonella Typhimurium type III secretion effectors stimulate innate immune  
602 responses in cultured epithelial cells. *PLoS Pathog* 5:e1000538.
- 603 15. Hapfelmeier S, Stecher B, Barthel M, Kremer M, Müller AJ, Heikenwalder M,  
604 Stallmach T, Hensel M, Pfeffer K, Akira S, Hardt W-D. 2005. The Salmonella  
605 pathogenicity island (SPI)-2 and SPI-1 type III secretion systems allow Salmonella  
606 serovar typhimurium to trigger colitis via MyD88-dependent and MyD88-  
607 independent mechanisms. *J Immunol* 174:1675–1685.
- 608 16. Barthel M, Hapfelmeier S, Quintanilla-Martínez L, Kremer M, Rohde M, Hogardt M,  
609 Pfeffer K, Rüssmann H, Hardt W-D. 2003. Pretreatment of mice with streptomycin  
610 provides a Salmonella enterica serovar Typhimurium colitis model that allows  
611 analysis of both pathogen and host. *Infect Immun* 71:2839–2858.
- 612 17. Cobo ER, Chadee K. 2013. Antimicrobial Human  $\beta$ -Defensins in the Colon and  
613 Their Role in Infectious and Non-Infectious Diseases. *Pathogens* 2:177–192.
- 614 18. Reynolds JM, Martinez GJ, Nallaparaju KC, Chang SH, Wang Y-H, Dong C. 2012.  
615 Cutting edge: regulation of intestinal inflammation and barrier function by IL-17C. *J*  
616 *Immunol* 189:4226–4230.
- 617 19. Gong H, Ma S, Liu S, Liu Y, Jin Z, Zhu Y, Song Y, Lei L, Hu B, Mei Y, Liu H, Liu Y,  
618 Wu Y, Dong C, Xu Y, Wu D, Liu H. 2018. IL-17C Mitigates Murine Acute Graft-vs.-  
619 Host Disease by Promoting Intestinal Barrier Functions and Treg Differentiation.  
620 *Front Immunol* 9:2724.

- 621 20. Aguilar C, Cruz AR, Rodrigues Lopes I, Maudet C, Sunkavalli U, Silva RJ, Sharan  
622 M, Lisowski C, Zaldívar-López S, Garrido JJ, Giacca M, Mano M, Eulalio A. 2020.  
623 Functional screenings reveal different requirements for host microRNAs in  
624 Salmonella and Shigella infection. *Nat Microbiol* 5:192–205.
- 625 21. Herrera-Uribe J, Zaldívar-López S, Aguilar C, Luque C, Bautista R, Carvajal A,  
626 Claros MG, Garrido JJ. 2018. Regulatory role of microRNA in mesenteric lymph  
627 nodes after Salmonella Typhimurium infection. *Vet Res* 49:9.
- 628 22. Schulte LN, Eulalio A, Mollenkopf H-J, Reinhardt R, Vogel J. 2011. Analysis of the  
629 host microRNA response to Salmonella uncovers the control of major cytokines by  
630 the let-7 family. *EMBO J* 30:1977–1989.
- 631 23. Huang T, Huang X, Chen W, Yin J, Shi B, Wang F, Feng W, Yao M. 2019.  
632 MicroRNA responses associated with Salmonella enterica serovar typhimurium  
633 challenge in peripheral blood: effects of miR-146a and IFN- $\gamma$  in regulation of fecal  
634 bacteria shedding counts in pig. *BMC Vet Res* 15:195.
- 635 24. Raudvere U, Kolberg L, Kuzmin I, Arak T, Adler P, Peterson H, Vilo J. 2019.  
636 g:Profiler: a web server for functional enrichment analysis and conversions of gene  
637 lists (2019 update). *Nucleic Acids Res* 47:W191–W198.
- 638 25. Yan-Chun L, Hong-Mei Y, Zhi-Hong C, Qing H, Yan-Hong Z, Ji-Fang W. 2017.  
639 MicroRNA-192-5p Promote the Proliferation and Metastasis of Hepatocellular  
640 Carcinoma Cell by Targeting SEMA3A. *Appl Immunohistochem Mol Morphol*  
641 25:251–260.



- 642 26. Qu Y-L, Wang H-F, Sun Z-Q, Tang Y, Han X-N, Yu X-B, Liu K. 2015. Up-regulated  
643 miR-155-5p promotes cell proliferation, invasion and metastasis in colorectal  
644 carcinoma. *Int J Clin Exp Pathol* 8:6988–6994.
- 645 27. Winter SE, Thiennimitr P, Winter MG, Butler BP, Huseby DL, Crawford RW, Russell  
646 JM, Bevins CL, Adams LG, Tsolis RM, Roth JR, Bäumlér AJ. 2010. Gut  
647 inflammation provides a respiratory electron acceptor for *Salmonella*. *Nature*  
648 467:426–429.
- 649 28. Figueiredo JF, Barhoumi R, Raffatellu M, Lawhon SD, Rousseau B, Burghardt RC,  
650 Tsolis RM, Bäumlér AJ, Adams LG. 2009. *Salmonella enterica* serovar  
651 Typhimurium-induced internalization and IL-8 expression in HeLa cells does not  
652 have a direct relationship with intracellular Ca(2+) levels. *Microbes Infect* 11:850–  
653 858.
- 654 29. Gopinath S, Hotson A, Johns J, Nolan G, Monack D. 2013. The systemic immune  
655 state of super-shedder mice is characterized by a unique neutrophil-dependent  
656 blunting of TH1 responses. *PLoS Pathog* 9:e1003408.
- 657 30. MacDonald TT. 1992. Epithelial proliferation in response to gastrointestinal  
658 inflammation. *Ann N Y Acad Sci* 664:202–209.
- 659 31. El-Aouar Filho RA, Nicolas A, De Paula Castro TL, Deplanche M, De Carvalho  
660 Azevedo VA, Goossens PL, Taieb F, Lina G, Le Loir Y, Berkova N. 2017.  
661 Heterogeneous Family of Cyclomodulins: Smart Weapons That Allow Bacteria to  
662 Hijack the Eukaryotic Cell Cycle and Promote Infections. *Front Cell Infect Microbiol*

- 663 7:208.
- 664 32. Santos AJM, Durkin CH, Helaine S, Boucrot E, Holden DW. 2016. Clustered  
665 Intracellular *Salmonella enterica* Serovar Typhimurium Blocks Host Cell  
666 Cytokinesis. *Infect Immun* 84:2149–2158.
- 667 33. McCracken KW, Howell JC, Wells JM, Spence JR. 2011. Generating human  
668 intestinal tissue from pluripotent stem cells in vitro. *Nat Protoc* 6:1920–1928.
- 669 34. Bray NL, Pimentel H, Melsted P, Pachter L. 2016. Near-optimal probabilistic RNA-  
670 seq quantification. *Nat Biotechnol* 34:525–527.
- 671 35. Soneson C, Love MI, Robinson MD. 2015. Differential analyses for RNA-seq:  
672 transcript-level estimates improve gene-level inferences. *F1000Res* 4:1521.
- 673 36. Rainer J. 2017. *EnsDb.Hsapiens.v75*: Ensembl based annotation package. R  
674 package version 2.99.0.
- 675 37. Love MI, Huber W, Anders S. 2014. Moderated estimation of fold change and  
676 dispersion for RNA-seq data with DESeq2. *Genome Biol* 15:550.
- 677 38. Benjamini Y, Hochberg Y. 1995. Controlling the False Discovery Rate: A Practical  
678 and Powerful Approach to Multiple Testing. *Journal of the Royal Statistical Society:*  
679 *Series B (Methodological)*.
- 680 39. Yu G, He Q-Y. 2016. ReactomePA: an R/Bioconductor package for reactome  
681 pathway analysis and visualization. *Mol Biosyst* 12:477–479.
- 682 40. Wickham H. 2016. *ggplot2: Elegant Graphics for Data Analysis*. Springer.

- 683 41. Wickham H, Francois R, Henry L, Müller K, Others. 2015. dplyr: A grammar of data  
684 manipulation. R package version 0 4 3.
- 685 42. Larsson J. 2019. eulerr: Area-Proportional Euler and Venn Diagrams with Ellipses.
- 686 43. Kolde R. 2018. pheatmap: Pretty Heatmaps.
- 687 44. Jones BD, Falkow S. 1994. Identification and characterization of a Salmonella  
688 typhimurium oxygen-regulated gene required for bacterial internalization. *Infect*  
689 *Immun* 62:3745–3752.
- 690 45. Guy RL, Gonias LA, Stein MA. 2000. Aggregation of host endosomes by  
691 Salmonella requires SPI2 translocation of SseFG and involves SpvR and the fms–  
692 aroE intragenic region. *Mol Microbiol*.
- 693
